# Supplementary material for: Biometric indices and population parameters of three polynemid fishes from Batang Lassa Estuary of East Malaysia
Source: PeerJ. 2021 Oct 15;9:e12183. doi: 10.7717/peerj.12183 (PMC8522647; doi:10.7717/peerj.12183)
Supplement: Supplemental Information 2 [file peerj-09-12183-s002.xlsx]

## Sheet: Sheet1
	Filimanus xanthonema
SL	Midlength (cm)	15/4/2019	15/7/2019	15/9/2019	15/10/2019	15/11/2019	15/1/2020	15/2/2020	15/7/2020	15/9/2020	Frequency
1	5				3	9					12
2	6				12	10					22
3	7	3		1	5	3					12
4	8	4					2	1			7
5	9	7	1	1			5	3	3		20
6	10	3		2			10	8	3	2	28
7	11		2	3			7	7	2	3	24
8	12		1	4					2	5	12
9	13		1	4					1	5	11
10	14			2						1	3
11	15			1							1
	Total	17	5	18	20	22	24	19	11	16	152

## Sheet: Polynemus melanochir
	Polynemus melanochir
	Sl.	Mid L (cm)	April,19	Jul,19	Sept,19	Oct,19	Nov,19	Dec,19	Jan,20	Feb,20	Jul,20	Aug,20	Sept,20	Frequncy
	1	5.3	6											6
	2	6.8	10											10
	3	8.3	8								3			11
	4	9.8	5			7	4				3			19
	5	11.3		9		6	2		2					19
	6	12.8		3		5	4	9	2	3				26
	7	14.3		1		7	6	12	3	4				33
	8	15.8		3			2		6	5				16
	9	17.3				6	2		3	6	4			21
	10	18.8		7	9	2	3		6	3	2	2	2	36
	11	20.3		2	3	2				3	3	2	11	26
	12	21.8			2							12	6	20
	13	23.3										5		5
	14	24.8										4		4
	15	26.3	2											2
		Total	31	25	14	35	23	21	22	24	15	25	19	254

## Sheet: Polynemus paradiseus
	Polynemus paradiseus
	Sl.	Mid L (cm)	April,19	Jul,19	Aug,19	Sept,19	Oct,19	Nov,19	Dec,19	Jan,20	Feb,20	Jul,20	Aug,20	Sept,20	Frequency
	1	4	2							18	2				22
	2	6	45							35	16				96
	3	8	39							9	10	3			61
	4	10	30	8			13	10			2	12		2	77
	5	12	3	5			7	18	5						38
	6	14	1	1			10	19	9			6			46
	7	16	1	3			5	10				3			22
	8	18		3		14	7	2				2			28
	9	20		3		11	6	2						7	29
	10	22	2	4	12								11	3	32
	11	24	1		3								3		7
	12	26	1												1
		Total	125	27	15	25	48	61	14	62	30	26	14	12	459
